# Supplementary material for: Extracellular microRNA-21 and microRNA-26a increase in body fluids from rats with antigen induced pulmonary inflammation and children with recurrent wheezing
Source: PubMed Central journal article supplement (PMC4831091; doi:10.1186/s12890-016-0216-2), 2016-04-14
Supplement: 12890_2016_216_MOESM1_ESM.pdf [file 12890_2016_216_MOESM1_ESM.pdf]

## **Additional file 1**

### ***Evaluation of methodology for circulating miRNA RT-qPCR***

Firstly, we examined the specificity of our RT-qPCR system by checking performance in control samples. The spiked in cel-miR-39 was replaced with pure water in non-spike-in control, and the amplification signal of cel-miR-39 was undetectable with a disorganized melting curve, suggesting that cel-miR-39 was not present in human samples and was appropriate as an endogenous control. RT enzyme was replaced with pure water during cDNA processing in non-RT control, and the signals from cel-miR-39 or other endogenous miRNAs were all undetectable. cDNA template was replaced with pure water during qPCR in non-template control, and the signal were absent for all target miRNAs. The results ruled out the presence of non-specific amplification. In addition, to monitor the reproducibility of the plasma miRNA levels, a homemade QC sample was set in each batch of RT-qPCR runs. During four batches of plasma miRNA determination, the raw Ct value of QC sample for cel-miR-39 was  $23.59 \pm 0.08$ , with a CV of 0.68%, and for target miRNA (such as miR-21) the result was  $22.34 \pm 0.014$ , with a CV of 0.13%. All above-mentioned results demonstrated the reliability of this methodology.

### **Cell counts in plasma from wheezing children**

According to the results from routine blood test (Figure S2), LRI condition could increase absolute and relative neutrophil cell counts, relative basophil cell counts and absolute platelet numbers, as well as decrease absolute and relative lymphocyte counts. These various leukocyte counts could respond to infection and

inflammation to some extent; however, none of these cell counts could effectively indicate wheezing condition.

Table S1. miRNAs participating in asthmatic condition

| miRNA               | expression pattern and potential function                                                                                                                                                                                                                          | validated targets in airway inflammation | in references |
|---------------------|--------------------------------------------------------------------------------------------------------------------------------------------------------------------------------------------------------------------------------------------------------------------|------------------------------------------|---------------|
| let-7a              | decreased in Th2 splenic cells of asthmatic mice                                                                                                                                                                                                                   | IL-13                                    | 1             |
| miR-21              | upregulated in allergic airway inflammation, LPS treated RAW264.7 and during macrophage-like differentiation process                                                                                                                                               | IL-12p35 & PDCD4                         | 2, 3          |
| miR-25              | regulating the level of many extracellular matrix proteins and contractile proteins in cytokine-stimulated human airway smooth muscle cells (HASM C)                                                                                                               | KLF4                                     | 4             |
| miR-26a             | induced in HASMC by mechanical stretch; inducing human airway smooth muscle hypertrophy by suppressing GSK-3 $\beta$                                                                                                                                               | No data                                  | 5             |
| miR-126             | induced in airway wall tissue of chronically challenged mice; participating in the recruitment of intraepithelial eosinophils and regulation of the effector function of Th2 cells                                                                                 | PU.1                                     | 3, 6          |
| miR-133a            | decreased in bronchial smooth muscle of the challenged mice and negatively regulating RhoA                                                                                                                                                                         | No data                                  | 7             |
| miR-143 and miR-672 | induced in pathological lung remodeling accompanied with the decrease of MMP12                                                                                                                                                                                     | No data                                  | 8             |
| miR-145             | participating in house dust mite-induced allergic airway disease in mice by regulating IL-5, IL-13                                                                                                                                                                 | No data                                  | 9             |
| miR-146a            | modulating human bronchial epithelial cell survival through up-regulating Bcl-x1 and STAT3 phosphorylation which might contribute the tissue repair and remodeling; inhibiting IL-1 $\beta$ induced IL-8 and RANTES release in human lung alveolar epithelial cell | No data                                  | 10, 11        |
| miR-148 and miR-152 | differentially targeting the specific HLA-G SNP alleles in human asthma                                                                                                                                                                                            | HLA-G                                    | 12            |

#### References in Table S1

1. Polikepahad S, Knight JM, Naghavi AO, Opl T, Creighton CJ, Shaw C, et al. Proinflammatory role for let-7 microRNAs in experimental asthma. *J Biol Chem* 2010; 285:30139-49.
2. Lu TX, Munitz A, Rothenberg ME. MicroRNA-21 is up-regulated in allergic airway inflammation and regulates IL-12p35 expression. *J Immunol* 2009; 182:4994-5002.
3. Mattes J, Collison A, Plank M, Phipps S, Foster PS. Antagonism of microRNA-126 suppresses the effector function of TH2 cells and the development of allergic airways disease. *Proc Natl Acad Sci U S A* 2009; 106:18704-9.
4. Kuhn AR, Schlauch K, Lao R, Halayko AJ, Gerthoffer WT, Singer CA. MicroRNA expression in human airway smooth muscle cells: role of miR-25 in regulation of airway smooth muscle phenotype. *Am J Respir Cell Mol Biol* 2010; 42:506-13.
5. Mohamed JS, Lopez MA, Boriek AM. Mechanical stretch up-regulates microRNA-26a and induces human airway smooth muscle hypertrophy by suppressing glycogen synthase kinase-3 $\beta$ . *J Biol Chem* 2010; 285:29336-47.

6. Collison A, Herbert C, Siegle JS, Mattes J, Foster PS, Kumar RK. Altered expression of microRNA in the airway wall in chronic asthma: miR-126 as a potential therapeutic target. *BMC Pulm Med* 2011; 11:29.
7. Chiba Y, Tanabe M, Goto K, Sakai H, Misawa M. Down-regulation of miR-133a contributes to up-regulation of Rhoa in bronchial smooth muscle cells. *Am J Respir Crit Care Med* 2009; 180:713-9.
8. Garbacki N, Di Valentin E, Piette J, Cataldo D, Crahay C, Colige A. Matrix metalloproteinase 12 silencing: a therapeutic approach to treat pathological lung tissue remodeling? *Pulm Pharmacol Ther* 2009; 22:267-78.
9. Collison A, Mattes J, Plank M, Foster PS. Inhibition of house dust mite-induced allergic airways disease by antagonism of microRNA-145 is comparable to glucocorticoid treatment. *J Allergy Clin Immunol* 2011; 128:160-7 e4.
10. Liu X, Nelson A, Wang X, Kanaji N, Kim M, Sato T, et al. MicroRNA-146a modulates human bronchial epithelial cell survival in response to the cytokine-induced apoptosis. *Biochem Biophys Res Commun* 2009; 380:177-82.
11. Perry MM, Moschos SA, Williams AE, Shepherd NJ, Larner-Svensson HM, Lindsay MA. Rapid changes in microRNA-146a expression negatively regulate the IL-1beta-induced inflammatory response in human lung alveolar epithelial cells. *J Immunol* 2008; 180:5689-98.
12. Tan Z, Randall G, Fan J, Camoretti-Mercado B, Brockman-Schneider R, Pan L, et al. Allele-specific targeting of microRNAs to HLA-G and risk of asthma. *Am J Hum Genet* 2007; 81:829-34.

Table S2. The theoretical minimum sample volume calculated according to results from small sample test

| miRNAs  | LRI control group (n=20) |      | wheezing+LRI group (n=20) |       | theoretical minimum sample volume# |
|---------|--------------------------|------|---------------------------|-------|------------------------------------|
|         | mean                     | SD   | mean                      | SD    |                                    |
| miR-21  | 1.00                     | 0.78 | 8.20                      | 14.53 | 64                                 |
| miR-25  | 1.00                     | 0.60 | 2.19                      | 2.22  | 55                                 |
| miR-26a | 1.00                     | 1.24 | 4.53                      | 7.40  | 69                                 |
| miR-133 | 1.00                     | 0.83 | 2.00                      | 1.86  | 54                                 |
| miR-148 | 1.00                     | 0.85 | 0.48                      | 0.18  | 42                                 |

#: Theoretical minimum sample volume was calculated using the statistical formula

$$n = \frac{2\sigma^2(t_\alpha + t_\beta)^2}{(\mu_1 - \mu_2)^2}, \text{ in which } \alpha=0.05, \beta=0.2, t_\alpha=1.96, t_\beta=0.842$$

Table S3. RNA concentration and purity validation during the RNA isolation process (quantitative data are shown as mean $\pm$ SEM)

| groups              | n  | RNA concentration (ng/ $\mu$ l) | A <sub>260</sub> /A <sub>280</sub> ratio |
|---------------------|----|---------------------------------|------------------------------------------|
| indifferent control | 35 | 389 $\pm$ 17                    | 1.731 $\pm$ 0.018                        |
| LRI control         | 35 | 402 $\pm$ 33                    | 1.684 $\pm$ 0.023                        |
| wheezing+LRI        | 70 | 381 $\pm$ 26                    | 1.722 $\pm$ 0.023                        |

Table S4.Primer information of miRNAs

| miRNA name          | accession No.  | primer sequences                                |
|---------------------|----------------|-------------------------------------------------|
| cel-miR-39-3p       | MIMAT0000010   | TCACCGGGTGTAATCAGCTTG                           |
| hsa-let-7a-5p       | MIMAT0000062   | TGAGGTAGTAGGTTGTATAGTT                          |
| hsa(rno)-miR-21     | MIMAT0000076   | TAGCTTATCAGACTGATGTTGA                          |
| hsa-miR-25-3p       | MIMAT0000081   | CATTGCACTTGTCTCGGTCTGA                          |
| hsa(rno)-miR-26a-5p | MIMAT0000082   | TTCAAGTAATCCAGGATAGGCT                          |
| hsa-miR-126-3p      | MIMAT0000445   | TCGTACCGTGAGTAATAATGCG                          |
| hsa-miR-133a        | MIMAT0000427   | TTTGGTCCCCTTCAACCAGCTG                          |
| hsa-miR-143-3p      | MIMAT0000435   | TGAGATGAAGCACTGTAGCTC                           |
| hsa-miR-145-5p      | MIMAT0000437   | GTCCAGTTTTCCCAGGAATCCCT                         |
| hsa-miR-146a        | MIMAT0000449   | TGAGAACTGAATTCCATGGGTT                          |
| hsa-miR-148a-3p     | MIMAT0000243   | TCAGTGCCTACAGAACTTTGT                           |
| hsa-miR-152         | MIMAT0000438   | TCAGTGCATGACAGAACTTGG                           |
| U6 snRNA            | GenBank:K00784 | F: CTCGCTTCGGCAGCACA<br>R: AACGCTTCACGAATTTGCGT |

Note: miRNA accession numbers are obtained from miRBase database (Release 21).

Table S5. Correlation analysis of plasma miR-21 or miR-26a and various leukocyte counts

| variable A     | variable B                     | correlation coefficient ( <i>r</i> ) | Significance ( <i>P</i> ) |
|----------------|--------------------------------|--------------------------------------|---------------------------|
| plasma miR-21  | miR-21 in blood cell pellets   | 0.027                                | 0.810                     |
|                | plasma total IgE               | 0.242                                | 0.023                     |
|                | total leukocyte count          | -0.139                               | 0.180                     |
|                | absolute neutrophil count      | -0.053                               | 0.612                     |
|                | absolute lymphocyte count      | -0.127                               | 0.227                     |
|                | absolute monocyte count        | 0.008                                | 0.940                     |
|                | absolute eosinophil count      | 0.021                                | 0.840                     |
|                | absolute basophil count        | 0.112                                | 0.285                     |
|                | relative neutrophil percentage | 0.102                                | 0.333                     |
|                | relative lymphocyte percentage | -0.145                               | 0.167                     |
|                | relative monocyte percentage   | 0.081                                | 0.445                     |
|                | relative eosinophil percentage | 0.095                                | 0.365                     |
|                | relative basophil percentage   | 0.030                                | 0.777                     |
|                | platelet count                 | -0.019                               | 0.857                     |
| plasma miR-26a | miR-26a in blood cell pellets  | -0.132                               | 0.270                     |
|                | plasma total IgE               | 0.267                                | 0.020                     |
|                | total leukocyte count          | -0.084                               | 0.458                     |
|                | absolute neutrophil count      | 0.090                                | 0.427                     |
|                | absolute lymphocyte count      | -0.218                               | 0.054                     |
|                | absolute monocyte count        | 0.034                                | 0.768                     |
|                | absolute eosinophil count      | 0.099                                | 0.383                     |
|                | absolute basophil count        | 0.278                                | 0.013                     |
|                | relative neutrophil percentage | 0.173                                | 0.127                     |
|                | relative lymphocyte percentage | -0.161                               | 0.157                     |
|                | relative monocyte percentage   | 0.137                                | 0.233                     |
|                | relative eosinophil percentage | 0.065                                | 0.570                     |
|                | relative basophil percentage   | 0.293                                | 0.009                     |
|                | platelet count                 | 0.162                                | 0.152                     |

The correlation analyses were analyzed with Spearman correlation with Bonferroni adjustment for multiple comparisons. The corresponding p value was considered as significant if  $p < 0.0036$  (0.05 was divided by 14).



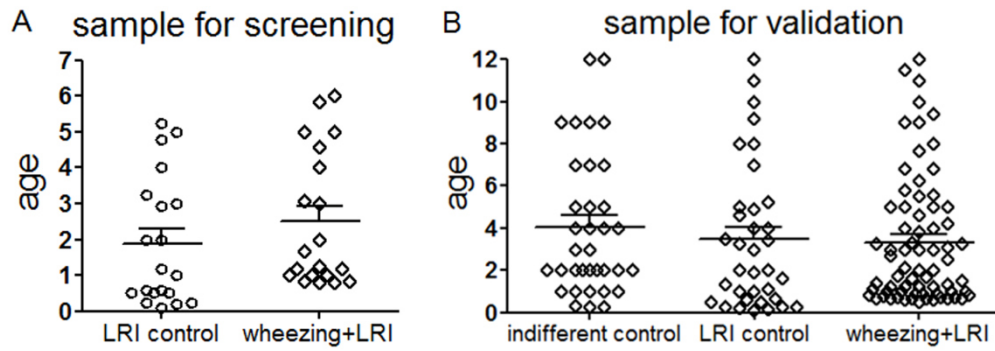

Figure S1 Balanced age distribution of individuals in samples for miRNA screening (a) or validation (b)

Balance of patients' ages in screening sample was analyzed using Mann-Whitney test, and ages in validation sample were analyzed by Kruskal-Wallis test followed with Mann-Whitney test.

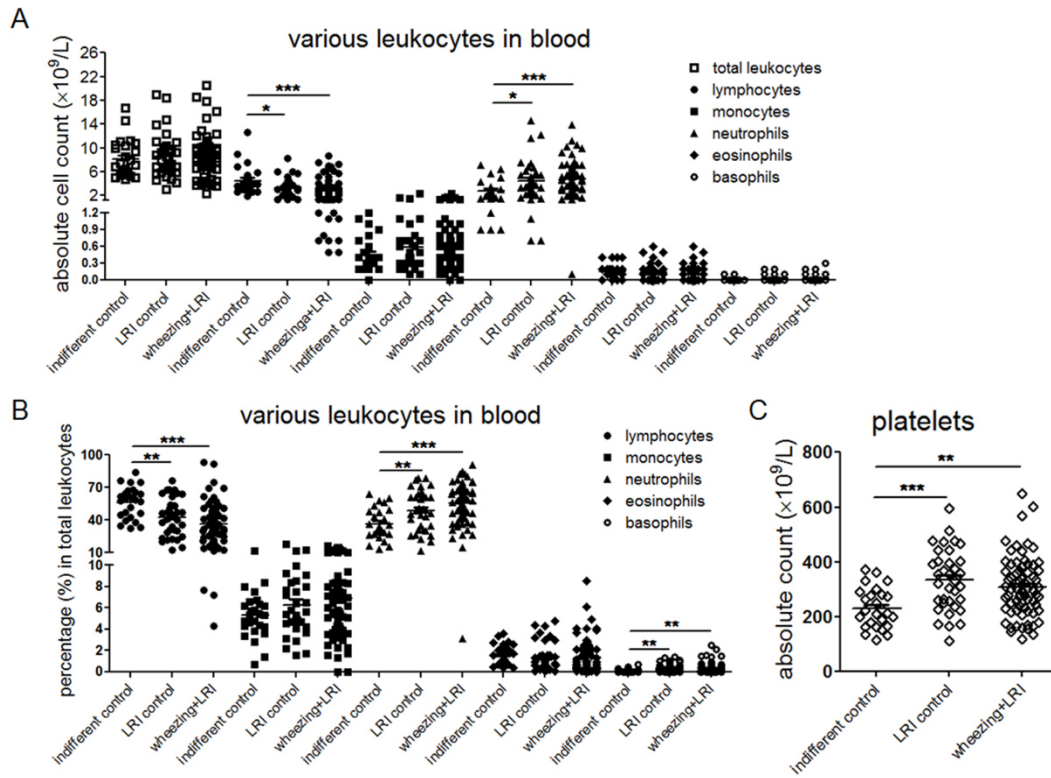

Figure S2 cell counts in blood of wheezing children

A. Absolute cell count of various leukocytes in blood

B. Relative percentage of various cells in total blood leukocytes

C. Platelet numbers in blood

Differences among three groups were analyzed by Kruskal-Wallis test followed Mann-Whitney test for difference between groups according to data characteristics. \*:  $p < 0.05$ , \*\*:  $p < 0.01$ , \*\*\*:  $p < 0.001$
